# Supplementary material for: Comprehensive analysis of macrophage-associated inflammatory genes in AMI based on bulk combined with single-cell sequencing data
Source: PeerJ journal article supplement (doi:10.7717/peerj.17981), 2024-09-18
Supplement: MIQEchecklist.xls [file MIQEchecklist.xls]

## Sheet: Sheet1
ITEM TO CHECK	IMPORTANCE	CHECKLIST
EXPERIMENTAL DESIGN
Definition of experimental and control groups	E	In animal experiments, mice were randomly divided into AMI group (with ligature left coronary artery) and Sham group (with open left coronary artery and no ligature) , and cell experiments were divided into AMI group and untreated Sham group. (125/165)
Number within each group	E	In animal experiments, there were 6 mice in each group. In cell experiments, each group had 6 biologically repeated experiments. (125/165)
Assay carried out by core lab or investigator's lab?	D	investigator's lab.
Acknowledgement of authors' contributions	D	All the participants were listed as authors and were ordered according to authorship contributions.
SAMPLE
Description	E	AMI group mice were used ligation of left coronary artery. The sham-operation group mice were operated in the same way but not ligated.After 1 week of LAD ligation in mice,the heart tissue was collected. In the cell experiment, the total RNA was collected at 48h after treatment. (127/165)
Volume/mass of sample processed	D	The animal sample was 1 cubic centimeter of tissue from the lesion, which was extracted after fracturing by ultrasonic vibration. (156)
Microdissection or macrodissection	E	macrodissection.(141)
Processing procedure	E	Fresh samples obtained immediately after euthanasia. (156/165)
If frozen - how and how quickly?	E	The tissues were frozen at -80°C and thawed by adding TRIzol reagent directly. For cell samples, TRIzol reagent was used to collect them into EP tubes, which were then frozen and thawed into an ice box.These procedures are necessary for RNA extraction and preservation and are therefore not mentioned in the manuscript.(156/165)
If fixed - with what, how quickly?	E	Not applicable.
Sample storage conditions and duration (especially for FFPE samples)	E	Tissue samples, extracted RNA samples, and infrequently used cDNA samples were stored at -80°C, and frequently used cDNA samples were stored at -20°C.(179)
NUCLEIC ACID EXTRACTION
Procedure and/or instrumentation	E	The heart tissue were homogenized in Trizol. RNA from tissues or cells was collected, and after organic solvents such as chloroform, isopropanol, and ethanol. (165)
Name of kit and details of any modifications	E	The manufacturer's protocol was strictly applied. RNA was suspended in 50 µl of RNAse free water before quantification. (165)
Source of additional reagents used	D	Trizol from Thermo Fisher. (165)
Details of DNase or RNAse treatment	E	No DNAse treatment was applied.
Contamination assessment (DNA or RNA)	E	For each sample, no-reverse transcription controls were tested by qPCR using primers for GADPH reference gene. No amplification was detected ensuring the absence of significant genomic DNA contamination.The use of reagents was tested for contamination, and the negative control test without template was used to confirm amplification. (170)
Nucleic acid quantification	E	NanoDrop2000 was used for detection.
Instrument and method	E	spectrophotometry NanoDrop 2000.(165)
Purity (A260/A280)	D	A260/A280 was 1.97, A260/A230 was 2.02.
Yield	D	Not applicable.
RNA integrity method/instrument	E	Gel electrophoresis was used to detect 18S and 28S, and A260/A280 was used to detect RNA contamination and stability.
RIN/RQI or Cq of 3' and 5' transcripts	E	Not applied ,This method was not used in the laboratory.
Electrophoresis traces	D	In gel electrophoresis detection, 18S and 28S were found to be complete and clear bands.
Inhibition testing (Cq dilutions, spike or other)	E	Cq diluted.
REVERSE TRANSCRIPTION
Complete reaction conditions	E	cDNA synthesis was realized using random hexamers, a mix of deoxyribonucleotides, reverse transcription buffer, dithiothreitol, ribonuclease inhibitor, and Superscript II reverse transcriptase following exactly the manufacturer's protocol.(166)
Amount of RNA and reaction volume	E	Detailed instructions are provided in the instruction manual,1 μg of RNA; 10μLof reaction volume.(166)
Priming oligonucleotide (if using GSP) and concentration	E	no GSP was used.
Reverse transcriptase and concentration	E	HiScript III RT SuperMix for qPCR.The reagent is provided as a double concentration and is used at a dilution of 2 times. The detailed preparation method is provided in the instruction manual.(166)
Temperature and time	E	Operate strictly in accordance with the instructions, without change. (166)
Manufacturer of reagents and catalogue numbers	D	All reagents were purchased from vazyme.
Cqs with and without RT	D*	There was no DNA contamination in the samples.(167)
Storage conditions of cDNA	D	Frequently used cDNA samples were stored at -20 ° C and less commonly stored at -80 ° C. (167)
qPCR TARGET INFORMATION
If multiplex, efficiency and LOD of each assay.	E	Four techniques were repeated for each sample, and three data with similar repeatability were selected for analysis.
Sequence accession number	E	All referenced sequences in the text are provided in Table 1. (171)
Location of amplicon	D	Not applicable.
Amplicon length	E	Not marked, if necessary, please contact the corresponding author.
In silico specificity screen (BLAST, etc)	E	The BLAST program were used.
Pseudogenes, retropseudogenes or other homologs?	D	A BLAST analysis showed no homology with pseudogenes.
Sequence alignment	D	Not applicable.
Secondary structure analysis of amplicon	D	Not applicable.
Location of each primer by exon or intron (if applicable)	E	The location of exon boundaries within transcript sequences was not found.
What splice variants are targeted?	E	Assays were not designed to detect splice variants.
qPCR OLIGONUCLEOTIDES
Primer sequences	E	Primer sequences are provided in additional tables in the manuscript. (171)
RTPrimerDB Identification Number	D	Not applicable.
Probe sequences	D**	Not applicable.
Location and identity of any modifications	E	no revision
Manufacturer of oligonucleotides	D	Not applicable.
Purification method	D	Not applicable.
qPCR PROTOCOL
Complete reaction conditions	E	Refer to kit instructions,The reaction procedure were 95 ℃ for 10 min, 95 ℃ for 30 s, 60 ℃ for 30 s, and 72 ℃ for 1 min, for a total of 40 cycles. (168)
Reaction volume and amount of cDNA/DNA	E	Detailed instructions are provided in the instruction manual,10μL reaction volume; 1μL of cDNA.(167)
Primer, (probe), Mg++ and dNTP concentrations	E	Detailed instructions are provided in the instruction manual,AceQ qPCR SYBR Green ;Master Mix(2X); PCR Forward Primer (10 μM); PCR Reverse Primer (10 μM) .(167)
Polymerase identity and concentration	E	After checking the reagent item number provided in the article, is AceQ qPCR SYBR Green Master Mix (2X).(167)
Buffer/kit identity and manufacturer	E	AceQ qPCR SYBR Green Master Mix (vazyme). (167)
Exact chemical constitution of the buffer	D	Vazyme，Q511-02
Additives (SYBR Green I, DMSO, etc.)	E	SYBR Green.(167)
Manufacturer of plates/tubes and catalog number	D	0.2 ml in 8 tubes.
Complete thermocycling parameters	E	Refer to kit instructions,The reagent company and product number are attached in the article, and the relevant operation data can be inquired in detail,https://www.vazyme.com/product/233.html (169)
Reaction setup (manual/robotic)	D	manual.
Manufacturer of qPCR instrument	E	Bio-Rad.(167)
qPCR VALIDATION
Evidence of optimisation (from gradients)	D	Not determined.
Specificity (gel, sequence, melt, or digest)	E	sequence.
For SYBR Green I, Cq of the NTC	E	NTC were not amplified or with Cq > 35.
Standard curves with slope and y-intercept	E	Standard curves were determined with 7 points, 2-fold dilution series run in triplicate. Mean slope was -3.2244. Mean Y-intercept was 27.31.
PCR efficiency calculated from slope	E	99.09%.
Confidence interval for PCR efficiency or standard error	D	Not applicable.
r2 of standard curve	E	Not mentioned in the article, corresponding author can be contacted if necessary.
Linear dynamic range	E	The dynamic range covered 3 log10 concentrations.
Cq variation at lower limit	E	Not determined.
Confidence intervals throughout range	D	Not applicable.
Evidence for limit of detection	E	The lowest limit detection was not reached as the relationship was still linear at the lowest concentration used of 0.2 ng/µl; Cq were < 37 for all reactions.
If multiplex, efficiency and LOD of each assay.	E	Not applicable.
DATA ANALYSIS
qPCR analysis program (source, version)	E	iCycler software from Thermo Fisher Scientific.
Cq method determination	E	The stepone software established automatically a horizontal threshold through the exponential phase of the amplification plot where amplified cDNA just became detectable above the background fluorescence. The fractional cycle at which this horizontal thresholdcrossed the exponential phase determined the Cq.
Outlier identification and disposition	E	Three biological replicates.Each group was set up with 4 technique repeats, and the 3 most similar data were selected for analysis, all Cq were under the predefined cycle cut-off of 35.
Results of NTCs	E	NTCs were negative or > 36.
Justification of number and choice of reference genes	E	GADPH was selected as the internal reference gene. (171)
Description of normalisation method	E	Gene expression of an unknown sample was obtained relative to the sample with the lowest Cq value (DeltaCq) according to the Pfaffl's efficiency corrected model. Normalization of linear values was done by dividing by the geometric mean of the linear values of the optimal reference genes GAPDH.(171)
Number and concordance of biological replicates	D	Not applicable.
Number and stage (RT or qPCR) of technical replicates	E	The cDNA obtained by RT-PCR was tested for quality and concentration, and we performed three qPCR replicates for all samples included in the study. For target gene analysis (and normalization), four technical replicates were performed for each sample.
Repeatability (intra-assay variation)	E	ΔCq < 0.5 for all replicates. Intra-assay variation was expressed as standard deviation (SD) of the Cq variance.
Reproducibility (inter-assay variation, %CV)	D	Not applicable.
Power analysis	D	Not applicable.
Statistical methods for result significance	E	One-way ANOVA for comparisons between groups. Unpaired Student's t-test for compariosn between two groups.(174)
Software (source, version)	E	GraphPad 10.1.0. (174)
Cq or raw data submission using RDML	D	Not applicable.
Table 1. MIQE checklist for authors, reviewers and editors. All essential information (E) must be submitted with the manuscript. Desirable
information (D) should be submitted if available. If using primers obtained from RTPrimerDB, information on qPCR target, oligonucleotides,
protocols and validation is available from that source.
*: Assessing the absence of DNA using a no RT assay is essential when first extracting RNA. Once the sample has been validated as
RDNA-free, inclusion of a no-RT control is desirable, but no longer essential.
**: Disclosure of the probe sequence is highly desirable and strongly encouraged. However, since not all commercial pre-designed assay
vendors provide this information, it cannot be an essential requirement. Use of such assays is advised against.
