# Supplementary material for: Comprehensive analysis of macrophage-associated inflammatory genes in AMI based on bulk combined with single-cell sequencing data
Source: PeerJ journal article supplement (doi:10.7717/peerj.17981), 2024-09-18
Supplement: Raw_data.zip [file Raw_data.zip]

## Sheet: Sheet1
		Sham								AMI
		A1	A2	A3	A4	A5	A6			B1	B2	B3	B4	B5	B6
LVEDD(mm)		3.59	3.708	3.709	3.592	3.782	3.751	LVEDD(mm)		4.349	3.773	3.896	3.73	3.882	3.659
LVESD(mm)		2.363	2.394	2.234	2.257	2.347	2.268	LVESD(mm)		2.882	2.927	2.537	2.783	2.45	2.186
FS(%)		34.237	35.886	36.481	34.737	36.01	36.639	FS(%)		32.624	27.87	31.11	36.836	30.736	27.513
EF(%)		67.79	64.66	70.47	68.8	65.28	66.4	EF(%)		49.52	40.55	43.66	37.79	40.68	62.51
