# Supplementary material for: Comprehensive analysis of macrophage-associated inflammatory genes in AMI based on bulk combined with single-cell sequencing data
Source: PeerJ journal article supplement (doi:10.7717/peerj.17981), 2024-09-18
Supplement: Raw_dataPCR.xlsx [file Raw_dataPCR.xlsx]

## Sheet: Sheet1
		Sham								AMI
QT-qPCR		A1	A2	A3	A4	A5	A6	QT-qPCR		B1	B2	B3	B4	B5	B6
Saa3/GAPDH		1.16	1.06	1.22	1.16	1.01	1.08	Saa3/GADPH		1.08	2	4.32	4.28	2.2	4.16
Fcgr4/GADPH		0.93	0.78	0.93	0.95	1.04	0.93	Fcgr4/GADPH		1.16	0.79	1.14	0.86	0.88	1.38
Ms4a4c/GADPH		1.15	1.31	1.11	1.16	1.31	1.36	Ms4a4c/GADPH		1.76	0.88	1.34	1.08	1.91	1.11
Acp5/GADPH		1.22	1.1	1.89	1.17	0.96	2.1	Acp5/GADPH		1.23	1.05	1.16	0.95	1.2	0.92
